1 **Bringing plants and soils to life through a simple role-playing activity**

2

3 Michael E. Van Nuland<sup>1\*</sup>, Miranda Chen<sup>2</sup>, and Benjamin J. England<sup>3</sup>

4

5 <sup>1</sup> Department of Biology, Stanford University, Stanford, CA 94305

6 <sup>2</sup> University of Tennessee, Department of Ecology and Evolutionary Biology, Knoxville, TN,

7 37917

8 <sup>3</sup> University of Tennessee, Division of Biology, Knoxville, TN 37996

9

10 \* Corresponding author: [mvannula@stanford.edu](mailto:mvannula@stanford.edu)

## 11 **Motivation**

12           Biological interactions are a predominant way in which students learn about the  
13 ecological and evolutionary processes that influence biodiversity. However, most general  
14 biology textbooks primarily use animals, reptiles, or invertebrates as case studies to demonstrate  
15 the importance of interactions in nature (Uno, 1994; Schussler *et al.*, 2010; Link-Perez *et al.*,  
16 2010). This contrasts with the fact that (1) plants are ubiquitous, and students encounter them  
17 regularly in their daily lives, and (2) most interactions that plants rely on happen belowground.  
18 Since it can be difficult to present plants (and especially soils) in exciting ways, many students  
19 unintentionally cultivate a fauna-centric viewpoint of the natural world (Wandersee & Schussler,  
20 2001). To highlight the importance and relevance of plant-soil relationships, we devised a simple  
21 role-playing activity suitable for college students.

## 23 **Context**

24           Research on plant-soil interactions and their importance in ecology and evolution has  
25 blossomed in recent decades. Specifically, feedbacks occur when plants condition soil properties  
26 and, in return, are affected by the conditioned soils (Bever, 1994). Negative feedbacks reduce the  
27 performance of individuals of the same species relative to other species, resulting in negative  
28 frequency-dependent selection (Packer & Clay, 2000, Mangan *et al.*, 2010). Positive feedbacks  
29 encourage conspecifics to thrive in their respective soils more than heterospecifics, leading to the  
30 monodominance of single species (e.g., invasive species). These reciprocal interactions can  
31 shape the non-random assembly of plant communities (Bever 1994; van der Putten 2013).

## 33 **Purpose**

34           The activity has two main purposes: (1) to engage students in a more active interpretation  
35 and discussion of the interactions between plants and soils, and (2) to connect these interactions  
36 to larger concepts of drivers of biodiversity and ecosystem function. This aligns with a core  
37 concept in Biology (*sensu* AAAS, 2011): living systems are interconnected and interacting.  
38 Plant-soil interactions provide a rich example of the interconnectedness of living systems, but are  
39 hidden from everyday view and overshadowed by more popular teaching examples. By actively  
40 role-playing plants and soils, students can see how these interactions operate in nature.

41

#### 42 **Activity description**

43           The primary learning objective of this activity is for students **to recognize how plant-soil**  
44 **interactions alter patterns of plant community diversity.** This activity simulates how plant-  
45 soil feedbacks influence species abundance and richness over time. It is recommended that the  
46 game first be played in **Negative Mode.** A **Positive Mode** variation is introduced at the end of  
47 this description.

48           **Negative Mode** demonstrates how negative plant-soil feedbacks promote and maintain  
49 diversity. When the same plant species and soil properties are matched, the plant dies.  
50 Oppositely, plants survive when species and conditioned soils are mismatched. For example, if a  
51 Spruce interacts with soil that has been previously conditioned by Spruce, that plant will die. But  
52 if the soil has been conditioned by Pine, Ash, or Ailanthus species, the Spruce will survive.

53           The directions for setup are as follows:

54           (1) Split the class so that there are equal numbers of plant and soil players (Fig. 1a). Clear  
55 enough space in the room so that plant and soil players can stand in two opposing  
56 lines with no obstacles between the groups (Fig. 1b). Soil players each receive one

57 blank notecard and paperclip. Include a pile of paper cutouts of the different plant  
58 species (3x the total amount of plant players for each species) to serve as the species  
59 pool, as well as a separate discard pile for when plants die and are not returned to the  
60 species pool.

61 (2) Each plant player randomly draws one species from the species pool and returns to  
62 the line opposing soil players. Record the abundance of each plant species in the  
63 community at this initial time point ( $T_0$ ). These abundances are recorded on multiple  
64 graphs (one graph for each time point; Fig. 2a). Note: the game can be purposefully  
65 set at different levels of diversity at  $T_0$ .

66 After set-up, the gameplay begins:

67 (3) Plant players approach a random soil player to begin the conditioning phase that  
68 determines how plants change the physical, chemical, and biotic components of their  
69 soils based on traits related to their identity. For example, Ash leaves have lower  
70 carbon (C) to nitrogen (N) ratios than Spruce needles, which affects the quality of  
71 litter inputs to the soil and structures decomposer communities. To simulate  
72 conditioning, plant players hand their species to soil players, and soil players  
73 paperclip the species behind their soil card to hide the species that conditioned them.

74 (4) Plant players then randomly draw another species from the species pool, form a new  
75 line opposing the now-conditioned soil players, and interact with a random soil  
76 player. It is important that plant players do not know the conditioned status of soil  
77 players before interacting with them (just as tree seedlings cannot preferentially  
78 choose more hospitable soil locations in a forest). In this interaction, plants approach

79 soils and show their species identity; in response, soils reveal to the plants what  
80 species they have been conditioned with. If they match, the plant dies.

81 (5) Plants that survive remain standing next to their respective soil player (no other plant  
82 can interact with soils that have a surviving plant). Plants that die discard their species  
83 in a separate pile (i.e., their genes do not get returned to the gene pool), before  
84 randomly re-drawing species from the species pool to interact with the remaining  
85 unmatched soil players. This gameplay continues until all plants are surviving and  
86 matched with a soil player. At this point, pause the game to record diversity with  
87 species' abundances (Fig. 1b).

88 (6) Once diversity has been recorded, plants re-condition soils with their current species  
89 identity, making soil players clip the new species over their previous species before  
90 the next round (repeating Step 3). Again, the new conditioned statuses of soils should  
91 be hidden. Repeat steps 4-6 until you have measured diversity for multiple  
92 generations ( $T_0$ – $T_4$ , or longer).

93

94 **Positive Mode** is a variation of the game with rules to show how positive plant-soil  
95 feedbacks are unstable and reduce diversity as one species becomes monodominant (e.g.,  
96 invasion success through allelopathy). To play in Positive Mode, one plant species must be  
97 designated to have positive soil interactions, while all other plant species continue playing in  
98 Negative Mode. This designated species survives in all soil types conditioned by all species  
99 (including its own), and no other plant species can survive in soils conditioned by the designated  
100 species (Fig. 1b). For example, *Ailanthus* is an invasive tree species that produces toxic  
101 chemicals that inhibit the growth of nearby plants (Heisey 1990). Therefore, if *Ailanthus* were

102 designated to have positive interactions, they would survive in any soil no matter what plant  
103 species conditioned that soil. In addition, Pine, Spruce and Ash species would die if they interact  
104 with Ailanthus-conditioned soil or their respective soils.

105

### 106 **Assessment, feedback, and suggestions**

107 For a follow-up activity, we asked students to relate the direction of plant-soil feedbacks  
108 (positive or negative) to the abundance of specific plant species and total species richness (using  
109 results from the primary literature; Packer & Clay, 2000, Bais *et al.*, 2003, Klironomos, 2002,  
110 Mangan *et al.*, 2010, Bennett *et al.* 2017). Students successfully predicted that species with  
111 negative feedbacks would be rarer in communities that could sustain a greater number of total  
112 species, and that species with positive plant-soil interactions would be more abundant in less  
113 diverse communities.

114 We also asked the following question before and after the activity: “What do plant-soil  
115 feedbacks make you think of?”. Responses that included the words “fungi” or “mycorrhizae”  
116 increased 75%, and the word “diversity” appeared only in post-activity responses (7 out of 26  
117 responses) (Fig. 2b). This suggests that students began to recognize how the nature of plant-soil  
118 relationships relate to biodiversity patterns.

119 The activity takes ~30 minutes to complete and preceded a brief lecture and small group  
120 work in an upper-level Ecology course (24 students, 18-25 years old). Depending on student  
121 level and module topic, instructors using this activity could discuss a range of mechanisms, such  
122 as soil nutrient depletion by the plant, mutualistic benefits from mycorrhizal fungi, or build-up of  
123 soil-borne pathogens. Since plant-soil interactions have been explored in a variety of areas (van  
124 der Putten *et al.* 2013), the activity can be uniquely paired with different biology topics. For

125 introductory students, shapes could be used in place of species to focus on the mechanics of  
126 feedback loops in nature.

127         This activity may be most applicable for small class sizes (20-40 students). In larger  
128 classes, this activity could be implemented as a demonstration with student volunteers or during  
129 discussion/laboratory sections. We found it best to use paper cutouts and notecards to drive home  
130 the role-playing aspects of the game. We have provided resources for teachers to print the  
131 species used in the current example ([https://github.com/mvannuland/Species\\_supplies](https://github.com/mvannuland/Species_supplies)), but the  
132 activity is amenable to any suite of species (4-5 plant species is the appropriate number for a  
133 small class). With an inexpensive, time-efficient, and engaging activity, we hope to enable  
134 teachers to encourage student understanding of prolific, but overlooked, forms of biological  
135 interactions that impact the diversity and functioning of ecosystems.

136 **References**

- 137 American Association for the Advancement of Science (AAAS). (2011). Vision and Change in  
138 Undergraduate Biology Education: A Call to Action. *Washington, DC*.
- 139 Bais, H. P., Vepachedu, R., Gilroy, S., Callaway, R. M., & Vivanco J. M. (2003). Allelopathy  
140 and exotic plant invasion: from molecules and genes to species interactions. *Science, 301*,  
141 1377-1380.
- 142 Bennett, J. A., Maherali, H., Reinhart, K. O., Lekberg, Y., Hart, M. M., & Klironomos, J. (2017).  
143 Plant-soil feedbacks and mycorrhizal type influence temperate forest population  
144 dynamics. *Science, 355*, 181-184.
- 145 Bever, J. D. (1994). Feedback between plants and their soil communities in an old field  
146 community. *Ecology, 75*, 1965-1977.
- 147 Heisey, R. M. (1990). Evidence for allelopathy by tree-of-heaven (*Ailanthus altissima*). *Journal*  
148 *of Chemical Ecology, 16*, 2039-2055.
- 149 Klironomos, J. K. (2002). Feedback with soil biota contributes to plant rarity and invasiveness in  
150 communities. *Nature, 417*, 67-70.
- 151 Link-Pérez, M. A., Dollo, V. H., Weber, K. M., & Schussler, E. E. (2010). What's in a Name:  
152 Differential labelling of plant and animal photographs in two nationally syndicated  
153 elementary science textbook series. *International Journal of Science Education, 32*,  
154 1227-1242.
- 155 Mangan, S. A., Schnitzer, S. A., Herre, E. A., Mack, K. M. L., Valencia, M. C., Sanchez, E. I. &  
156 Bever, J. D. (2010). Negative plant-soil feedback predicts tree-species relative abundance  
157 in a tropical forest. *Nature, 466*, 752-755.



- 158 Packer, A. & Clay, K. (2000). Soil pathogens and spatial patterns of seedling mortality in a  
159 temperate tree. *Nature*, *404*, 278-281.
- 160 Schussler, E. E., Link-Pérez, M. A., Weber, K. M., & Dollo, V. H. (2010) Exploring plant and  
161 animal content in elementary science textbooks. *Journal of Biological Education*, *44*,  
162 123-128.
- 163 Uno, G. E. (1994). The state of precollege botanical education. *The American Biology*  
164 *Teacher*, *56*, 263-267.
- 165 van der Putten, W. H., Bardgett, R. D., Bever, J. D., Bezemer, T. M., Casper, B. B., Fukami, T.,  
166 *et al.* (2013). Plant-soil feedbacks: the past, the present and future challenges. *Journal of*  
167 *Ecology*, *101*, 265-276.
- 168 Wandersee, J. H. & Schussler, E. E. (2001). Toward a theory of plant blindness. *Plant Science*  
169 *Bulletin*, *47*, 2-9.

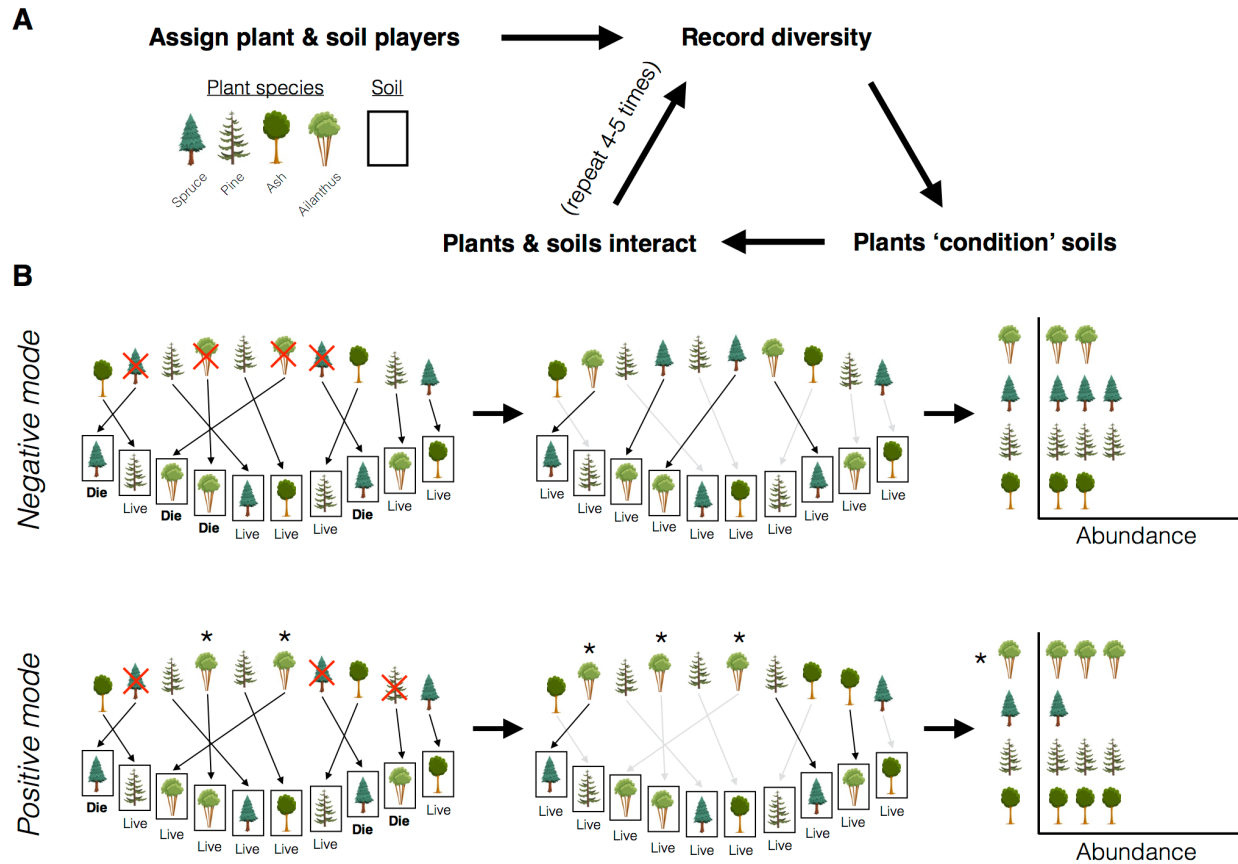

170

171

172 **Figure 1. How to perform the activity.** (A) The flow diagram outlines the general approach to

173 the activity. The game is based on many random 1-on-1 interactions between plant and soil

174 players. (B) The outcome of plant-soil interactions depend on the mode and identities of both

175 plant and soil players. Plants that live remain matched with their soils (players stand next to one

176 another; grey arrows). Plants that die discard their species, draw a new species from the species

177 pool, and interact with any unmatched soil. In negative mode, plants die when they interact with

178 soils conditioned by the same species (i.e., survival occurs when plants and soils are

179 mismatched). In positive mode, select one plant species that will have positive interactions (e.g.,

180 Ailanthus species marked with asteriks). This species survives in all soil types, and no other

181 species can survive in Ailanthus-conditioned soil. Plant species' abundances are recorded once

182 all plants are living to show how the species' abundance and community richness is shaped by

182 plant-soil interactions.
